# Supplementary material for: High Interferon Signature Leads to Increased STAT1/3/5 Phosphorylation in PBMCs From SLE Patients by Single Cell Mass Cytometry
Source: Front Immunol. 2022 Jan 28;13:833636. doi: 10.3389/fimmu.2022.833636 (PMC8851522; doi:10.3389/fimmu.2022.833636)
Supplement: Supplementary Table 1 — (related to Figure 1): IFN profiling. IFN biosignature profiling. Fluidigm multiplex qPCR measured 44 transcripts. Transcripts were chosen based on a literature query for transcript profiling of bulk PBMCs or magnetically sorted immune subsets from SLE patients. [file Table_1.xlsx]

## Sheet: Sheet1
	IFN biosignature profiling
	Gene	Protein
	ACTB	β-actin
	AGRN	Agrin
	AICDA	Activation-induced cytidine deaminase
	APOBEC3C	APOBEC-3C
	B2M	β-2-microglobulin
	C2	Complement component 2
	CAMP	cathelicidin antimicrobial peptide
	CCR7	C-C chemokine receptor type 7
	CIC	Protein capicua homolog
	DEFA1d	Defensin, alpha 1
	DEFA3d	Defensin, alpha 3
	ECRP	RNase A family, 2
	EPST1	Epithelial stromal interaction 1
	FCGR1B	Fc fragment of IgG, high affinity Ib, receptor
	GAPDH	glyceraldehyde-3-phosphate dehydrogenase
	HERC5	Probable E3 ubiquitin-protein ligase
	IFI35	IFN-induced 35 kDa protein
	IFI44	IFN-induced 44 kDa protein
	IFI44L	IFN-induced 44 kDa protein like
	IFIT1	IFN-induced protein with tetratricopeptide repeats 1
	IIFIT3	IFN-induced protein tetratricopeptide repeats 3
	IL1R2	Interleukin 1 receptor, type II
	IFITm3	Interferon-induced transmembrane protein 3
	IRF7	Interferon regulatory factor 7
	ISG15	Interferon-induced 17 kDa protein
	LGALS3BP	lectin, galactoside-binding, soluble, 3 binding protein
	LY6E	Lymphocyte antigen 6E
	MX1	Interferon-induced GTP-binding protein 1
	MX2	Interferon-induced GTP-binding protein 2
	OAS1	2'-5'-oligoadenylate synthetase 1
	OAS2	2'-5'-oligoadenylate synthetase 2
	OAS3	2'-5'-oligoadenylate synthetase 3
	OASL	2'-5'-Oligoadenylate Synthase-Like Protein
	PLSCR1	Phospholipid scramblase 1
	RNASE2	ribonuclease, RNase A family, 2
	SERPING	C1-inhibitor
	SIGLEC1	sialic acid binding Ig-like lectin 1
	STAT2	Signal transducer and activator of transcription 2
	TAP1	Transporter associated with Antigen Processing 1
	TNFRSF1	CD120 (TNF superfamily)
	TP63	Tumor protein p63
	TRDTR	T cell receptor delta locus
	TYK1	Leukocyte tyrosine kinase receptor
	XAF1	XIAP-associated factor 1
