# Supplementary material for: High Interferon Signature Leads to Increased STAT1/3/5 Phosphorylation in PBMCs From SLE Patients by Single Cell Mass Cytometry
Source: Front Immunol. 2022 Jan 28;13:833636. doi: 10.3389/fimmu.2022.833636 (PMC8851522; doi:10.3389/fimmu.2022.833636)
Supplement: Supplementary Table 2 — (related to Figure 4–6): Mass cytometry antibodies. Antibodies used for mass cytometry panels. Intracellular cytokine CyTOF panel (ICTOF) and phosphorylation of signaling protein CyTOF panel (pTOF). FLUIDIGM = FLUIDIGM Sciences, In house = antibody was conjugated and titrated in house. Grey box indicates use in panel. [file Table_2.xlsx]

## Sheet: Sheet1
	Antibodies used for mass cytometry panels
	Target	Clone	Supplier	Isotope	ICTOF	pTOF
	CCR7	150503	In house	Tm169
	CD107a	H4A3	FLUIDIGM	Eu151
	CD11c	Bu15	FLUIDIGM	Tb159
	CD127	A019D5	FLUIDIGM	Yb176
	CD127	A019D5	FLUIDIGM	Gd165
	CD14	M5E2	FLUIDIGM	Gd160
	CD16	B73.1	In house	Er166
	CD16	3G8	In house	Yb174
	CD19	HIB19	FLUIDIGM	Nd142
	CD20	2H7	FLUIDIGM	Sm147
	CD20	H1	In house	Sm147
	CD24	ML-5	In house	Gd157
	CD25	M-A241	In house	Dy164
	CD25	M-A251	In house	Yb173
	CD27	O323	In house	Sm152
	CD27	L128	FLUIDIGM	Er167
	CD28	L293	In house	Gd155
	CD3	UCHT1	FLUIDIGM	Er170
	CD3	UCHT1	FLUIDIGM	Sm154
	CD33	P67.8	In house	Gd158
	CD38	HIT2	FLUIDIGM	Er167
	CD4	RPA-T4	FLUIDIGM	Nd145
	CD40L	TRAP1	FLUIDIGM	Er168
	CD45RA	HI100	In house	Eu153
	CD49d	9F10	FLUIDIGM	Pr141
	CD56	HCD56	In house	Yb176
	CD56	HCD56	In house	Lu175
	CD57	HCD57	In house	Nd148
	CD69	HN50	FLUIDIGM	Dy162
	CD7	CD7-6B7	In house	Sm149
	CD8a	SK1	FLUIDIGM	Er168
	CD8a	SK1	FLUIDIGM	Nd146
	CD85j	292319	In house	Sm149
	CXCR5	51505	FLUIDIGM	Yb171
	GMCSF	BVD2-21C11	FLUIDIGM	Tb159
	HLA-DR	G46-6	In house	Gd157
	HLA-DR	L243	FLUIDIGM	Yb174
	IFNg	4S.B4	In house	Dy161
	IgD	BD-1A6-2	In house	Dy161
	IkB	CS L35A5	In house	Dy163
	IL-2	MQ1-17h12	FLUIDIGM	Er166
	IL-4	MP4-25D2	FLUIDIGM	Nd144
	IL-6	MQ2-13A5	FLUIDIGM	Gd156
	IL-17	N49-653	FLUIDIGM	Dy164
	IL-21	3A3-N2	FLUIDIGM	Yb172
	IL-22	22URTI	FLUIDIGM	Nd150
	Ox40	ACT35	In house	Gd156
	PD-1	EH12.2H7	In house	Eu151
	PD-1	EH12.1	In house	Er170
	Perforin	BD-4A	In house	Lu175
	pErk1/2	20A	In house	Dy162
	pPLCg2	BD-K860689.37	In house	Yb173
	pS6	N7-548	In house	Ho165
	pSTAT1	BD-4A	In house	Tm169
	pSTAT3	Y705	FLUIDIGM	Gd158
	pSTAT5	BD-47	In house	Yb172
	TCRgd	B1	In house	Dy163
	TNFa	Mab11	FLUIDIGM	Sm152
